# Supplementary material for: Stress-Driven Discovery of New Angucycline-Type Antibiotics from a Marine Streptomyces pratensis NA-ZhouS1
Source: PubMed Central journal article supplement (PMC6163593; doi:10.3390/md16090331), 2018-09-12
Supplement: marinedrugs-16-00331-s001.pdf [file marinedrugs-16-00331-s001.pdf]

## *Supplementary Material*

# **Stress-Driven Discovery of New Angucycline-Type Antibiotics from a Marine *Streptomyces pratensis* NA-ZhouS1**

Najeeb Akhter <sup>1</sup>, Yaqin Liu <sup>2</sup>, Bibi Nazia Auckloo <sup>1</sup>, Yutong Shi <sup>1</sup>, Kuiwu Wang <sup>3</sup>, Juanjuan Chen <sup>4</sup>, Xiaodan Wu <sup>5</sup>, and Bin Wu <sup>1,\*</sup>

<sup>1</sup> Ocean College, Zhejiang University, Hangzhou 310058, China. na\_memon@yahoo.com; naz22ia@hotmail.com; 11434028@zju.edu.cn; wubin@zju.edu.cn

<sup>2</sup> Department of Chemistry, Zhejiang University, Hangzhou 301000, China. yaqin86@zju.edu.cn

<sup>3</sup> Department of Chemistry, Zhejiang Gongshang University, Hangzhou 310012, China. [wkwnpc@zjgsu.edu.cn](mailto:wkwnpc@zjgsu.edu.cn)

<sup>4</sup> Key Laboratory of Applied Marine Biotechnology, Ningbo University, Chinese Ministry of Education, Ningbo 315211, China. chenjuanjuan@nbu.edu.cn.

<sup>5</sup> Centre of Analysis and Measurement, Zhejiang University, Hangzhou 310058, China. wxd\_zju@163.com

\* Correspondence: wubin@zju.edu.cn; Tel. /Fax: +86-05802092258

### List of supporting information

|                   |                                                                                         |     |
|-------------------|-----------------------------------------------------------------------------------------|-----|
| <b>Figure S1</b>  | <sup>1</sup> H NMR spectrum in MeOD for compound 1 -----                                | S3  |
| <b>Figure S2</b>  | <sup>13</sup> C NMR spectrum in MeOD for compound 1 -----                               | S3  |
| <b>Figure S3</b>  | DEPT-135 spectrum in MeOD for compound 1 -----                                          | S4  |
| <b>Figure S4</b>  | <sup>1</sup> H- <sup>1</sup> H COSY spectrum in MeOD for compound 1 -----               | S4  |
| <b>Figure S5</b>  | HSQC spectrum in MeOD for compound 1 -----                                              | S5  |
| <b>Figure S6</b>  | HMBC spectrum in MeOD for compound 1 -----                                              | S5  |
| <b>Figure S7</b>  | HMBC-2 spectrum in MeOD for compound 1 -----                                            | S6  |
| <b>Figure S8</b>  | NOESY spectrum in MeOD for compound 1 -----                                             | S6  |
| <b>Figure S9</b>  | <sup>1</sup> H NMR spectrum in MeOD for compound 2 -----                                | S7  |
| <b>Figure S10</b> | <sup>13</sup> C NMR spectrum in MeOD for compound 2 -----                               | S7  |
| <b>Figure S11</b> | DEPT-135 spectrum in MeOD for compound 2 -----                                          | S8  |
| <b>Figure S12</b> | <sup>1</sup> H- <sup>1</sup> H COSY spectrum in MeOD for compound 2 -----               | S8  |
| <b>Figure S13</b> | HSQC spectrum in MeOD for compound 2 -----                                              | S9  |
| <b>Figure S14</b> | HMBC spectrum in MeOD for compound 2 -----                                              | S9  |
| <b>Figure S15</b> | NOESY spectrum in MeOD for compound 2 -----                                             | S10 |
| <b>Figure S16</b> | <sup>1</sup> H NMR spectrum in MeOD for compound 3 -----                                | S10 |
| <b>Figure S17</b> | <sup>13</sup> C NMR spectrum in MeOD for compound 3 -----                               | S11 |
| <b>Figure S18</b> | DEPT-135 spectrum in MeOD for compound 3 -----                                          | S11 |
| <b>Figure S19</b> | <sup>1</sup> H NMR spectrum in CDCl <sub>3</sub> for compound 4 -----                   | S12 |
| <b>Figure S20</b> | <sup>13</sup> C NMR spectrum in CDCl <sub>3</sub> for compound 4 -----                  | S12 |
| <b>Figure S21</b> | <sup>1</sup> H NMR spectrum in CDCl <sub>3</sub> for compound 5 -----                   | S13 |
| <b>Figure S22</b> | <sup>13</sup> C NMR spectrum in CDCl <sub>3</sub> for compound 5 -----                  | S13 |
| <b>Figure S23</b> | DEPT-135 spectrum in CDCl <sub>3</sub> for compound 5 -----                             | S14 |
| <b>Figure S24</b> | <sup>1</sup> H NMR spectrum in CDCl <sub>3</sub> for compound 6 -----                   | S14 |
| <b>Figure S25</b> | <sup>13</sup> C NMR spectrum in CDCl <sub>3</sub> for compound 6 -----                  | S15 |
| <b>Figure S26</b> | HR-TOF-MS spectrum in negative mode for compound 1 -----                                | S15 |
| <b>Figure S27</b> | HR-TOF-MS spectrum in positive mode for compound 1 -----                                | S15 |
| <b>Figure S28</b> | MS <sup>n</sup> spectrum of compound 1 -----                                            | S16 |
| <b>Figure S29</b> | HR-TOF-MS spectrum in negative mode for compound 2 -----                                | S16 |
| <b>Figure S30</b> | HR-TOF-MS spectrum in positive mode for compound 2 -----                                | S17 |
| <b>Figure S31</b> | 16S ribosomal DNA gene, full sequence of <i>Streptomyces</i> sp. NA-ZhouS1-----         | S17 |
| <b>Figure S32</b> | Neighbor-joining phylogenetic tree based on 16S rDNA sequence for strain NA-ZhouS1----- | S18 |
| <b>Table S1</b>   | Biological activities of compounds (1-5) (MIC values are given in µg/mL)-----           | S17 |

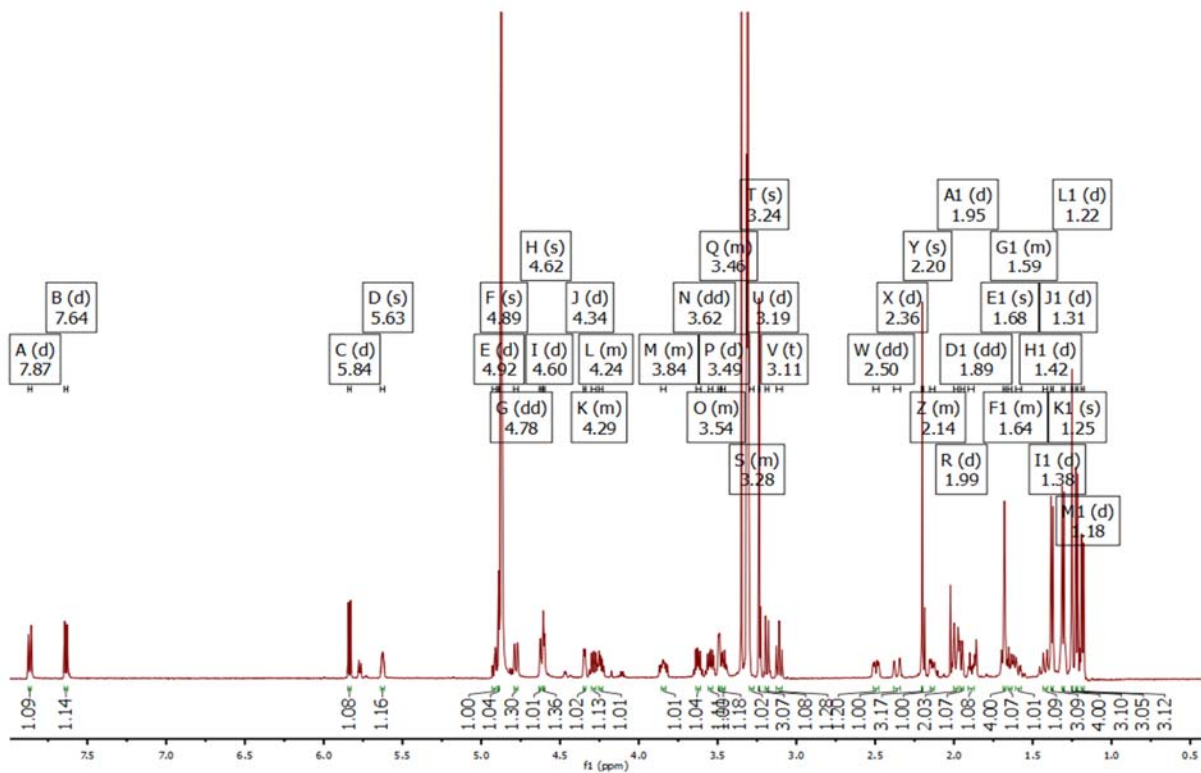

Figure S 1.  $^1\text{H}$  NMR spectrum in MeOD for compound 1.

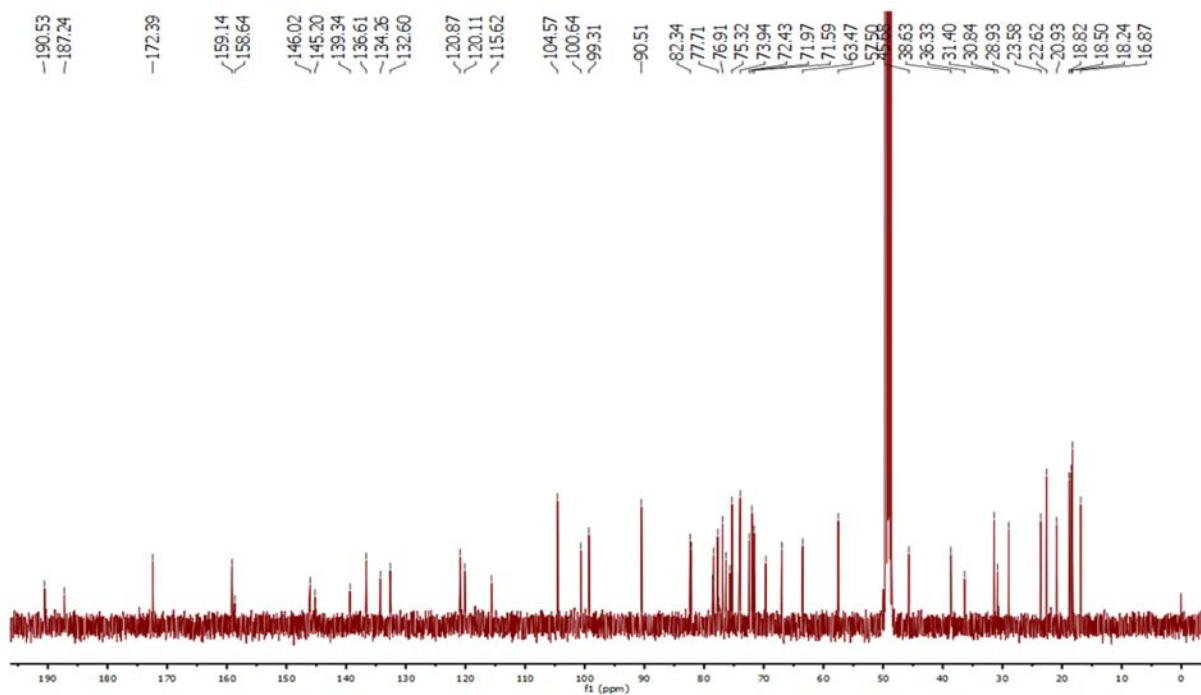

Figure S 2.  $^{13}\text{C}$  NMR spectrum in MeOD for compound 1.

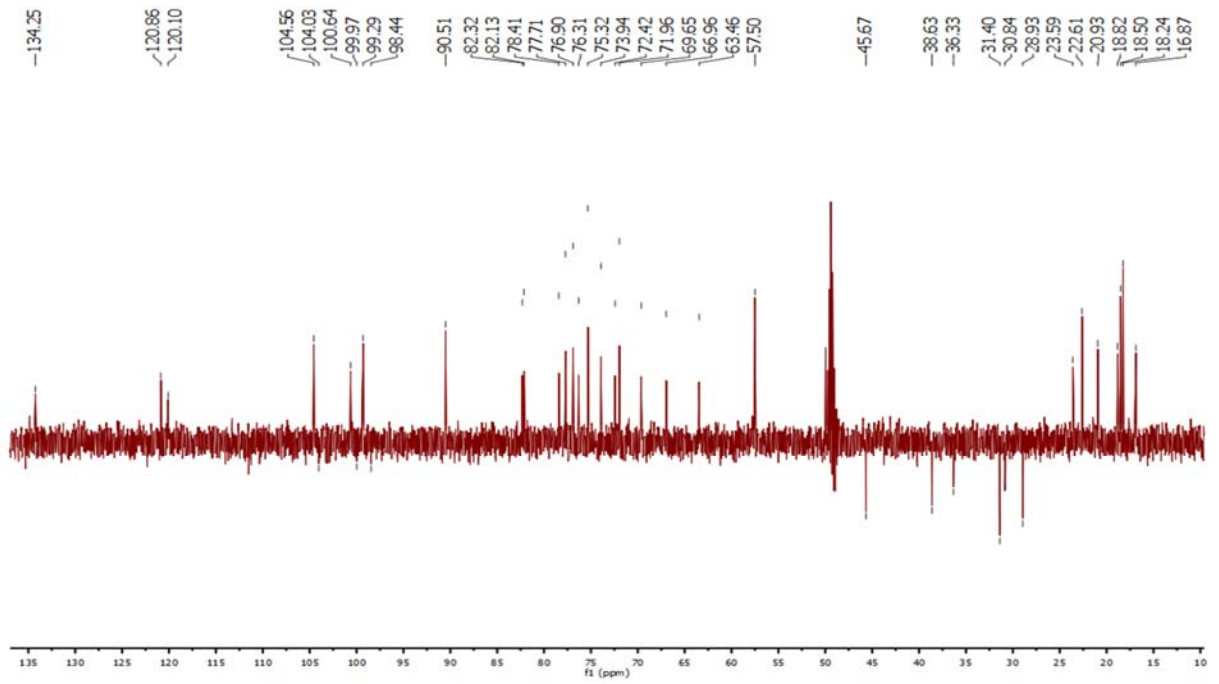

Figure S 3. DEPT-135 spectrum in MeOD for compound 1.

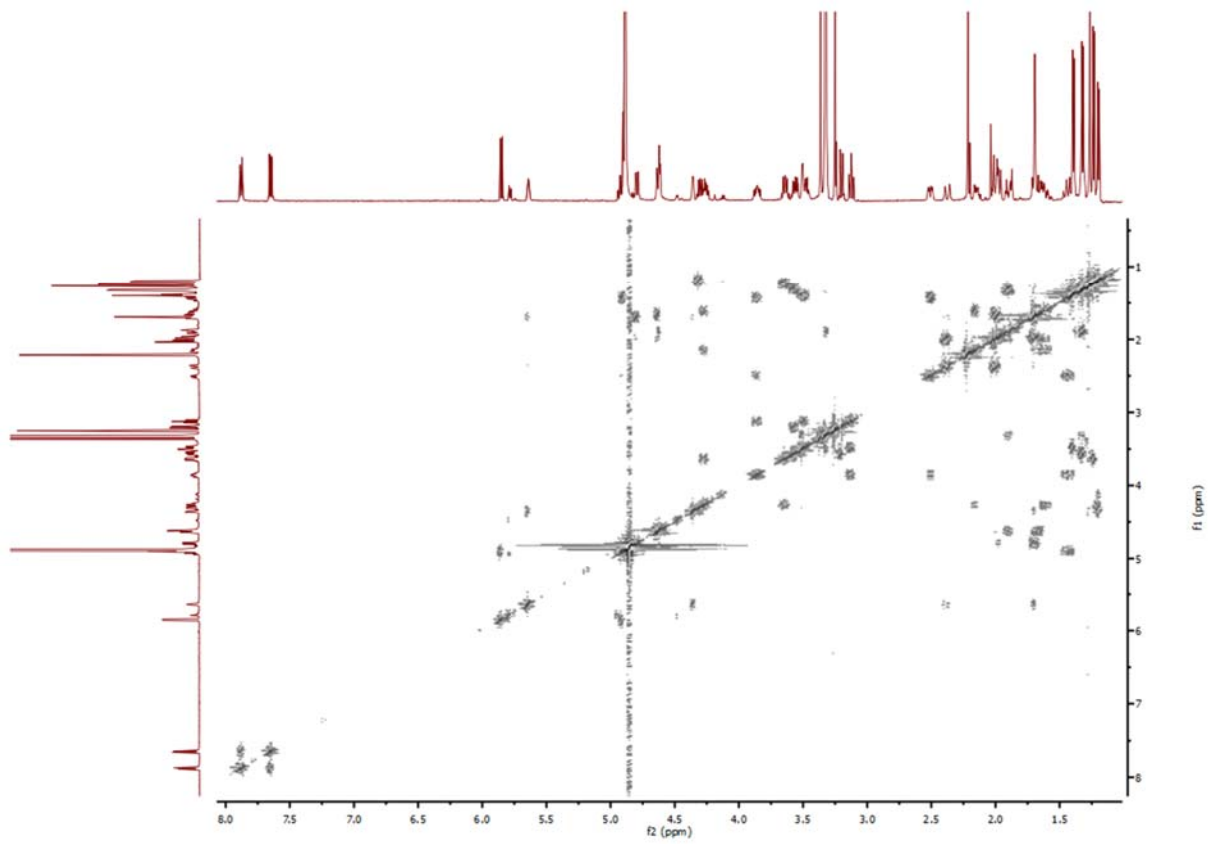

Figure S 4. COSY spectrum in MeOD for compound 1.

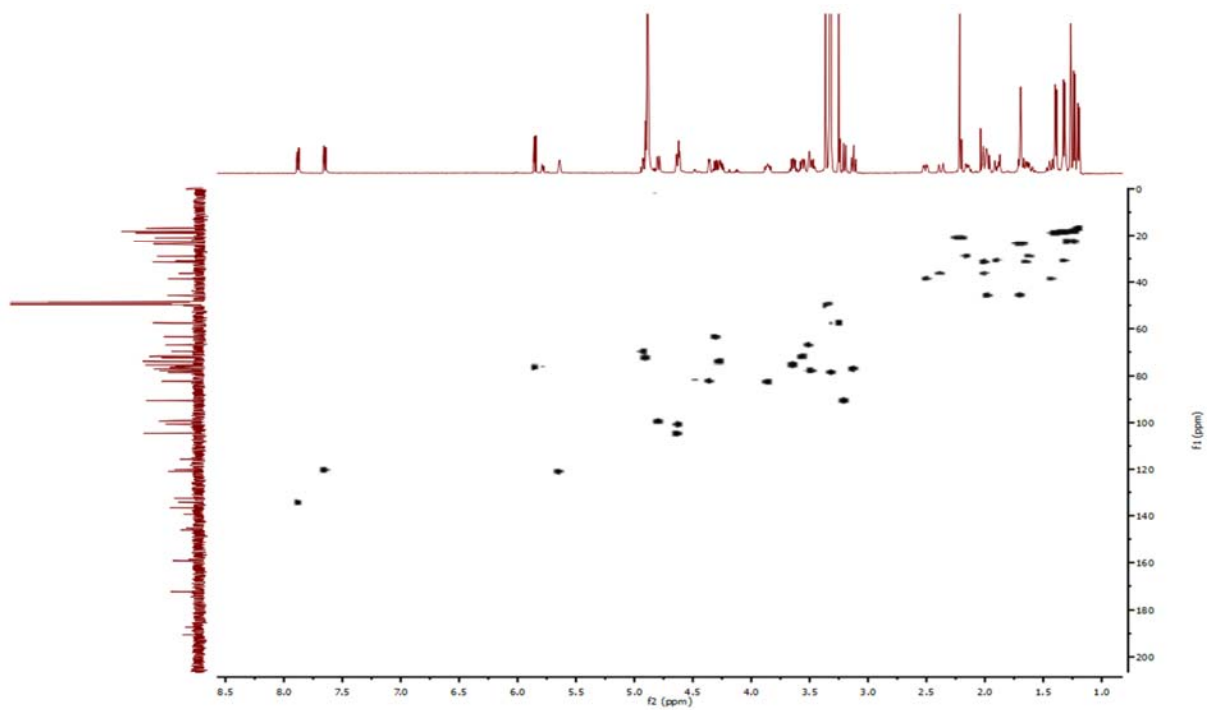

Figure S 5. HSQC spectrum in MeOD for compound 1.

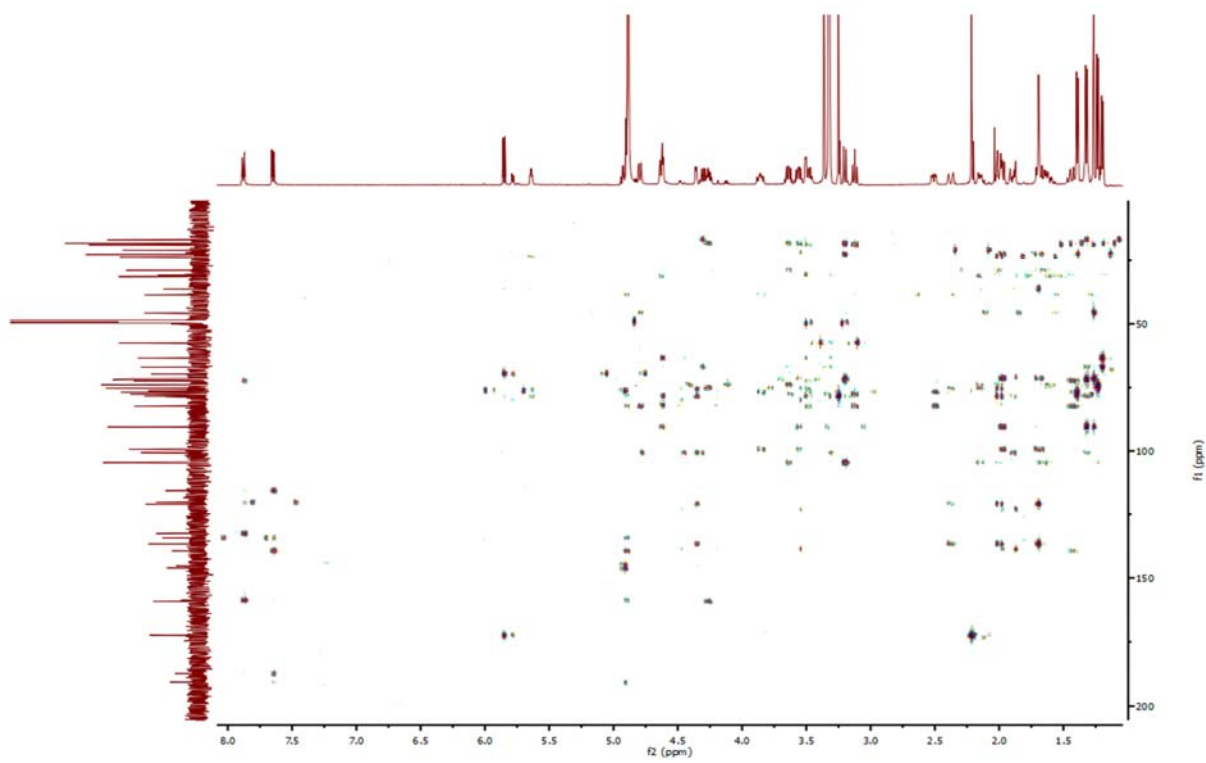

Figure S 6. HMBC spectrum in MeOD for compound 1.

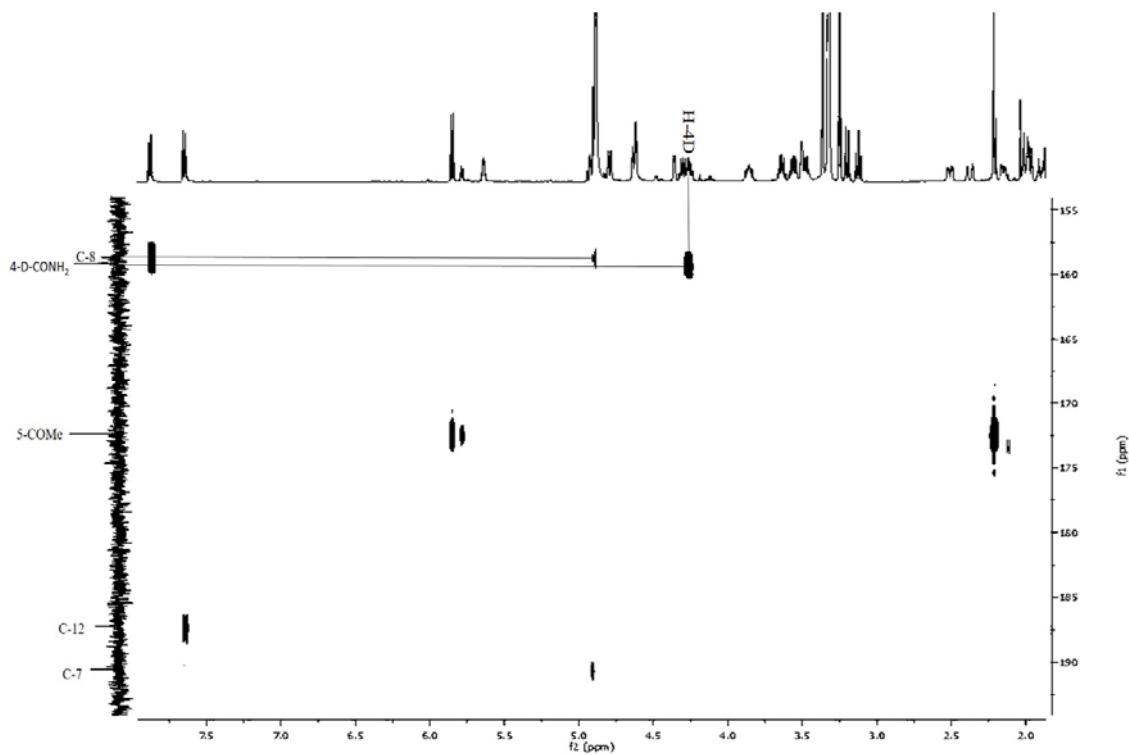

**Figure S 7.** HMBC-2 spectrum in MeOD for compound **1**. Enlarged view of the spectrum to clarify the cross peaks of H-4D to carbamoyl carbon resonated at  $\delta$ c 159.6.

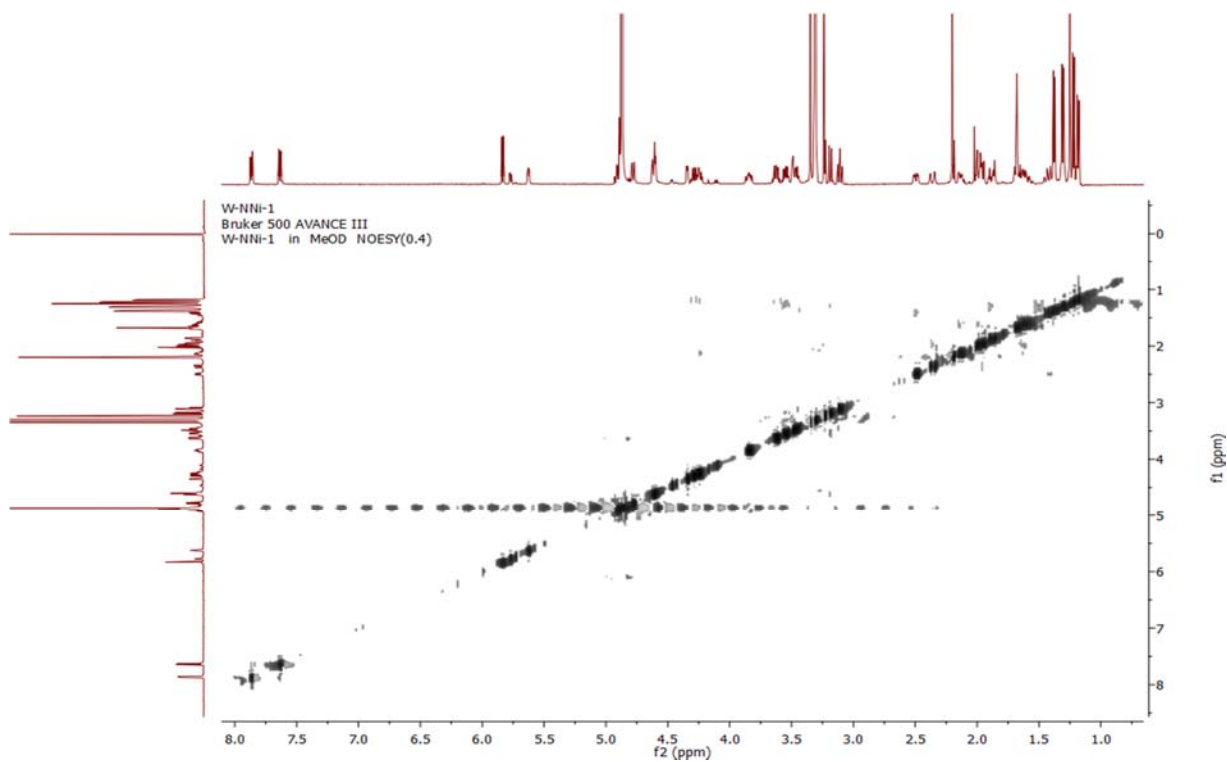

**Figure S 8.** NOESY spectrum in MeOD for compound **1**.

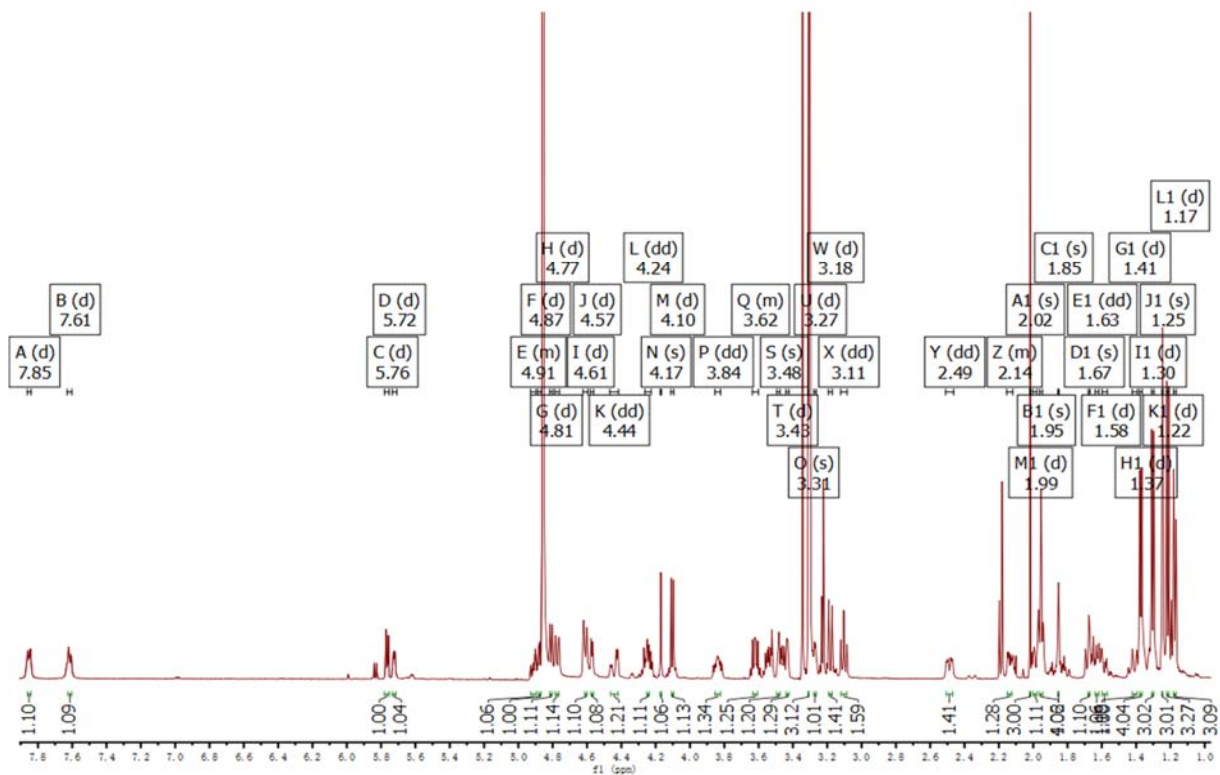

Figure S 9.  $^1\text{H}$  NMR spectrum in MeOD for compound 2.

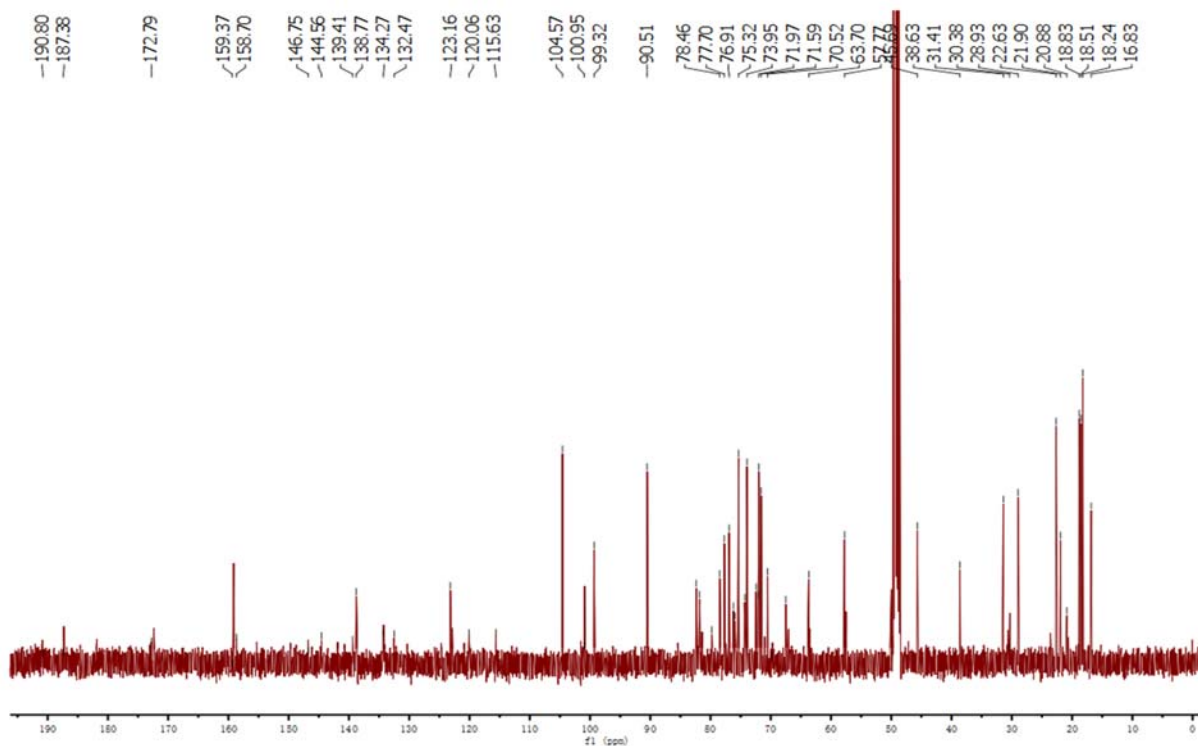

Figure S 10.  $^{13}\text{C}$  NMR spectrum in MeOD for compound 2.

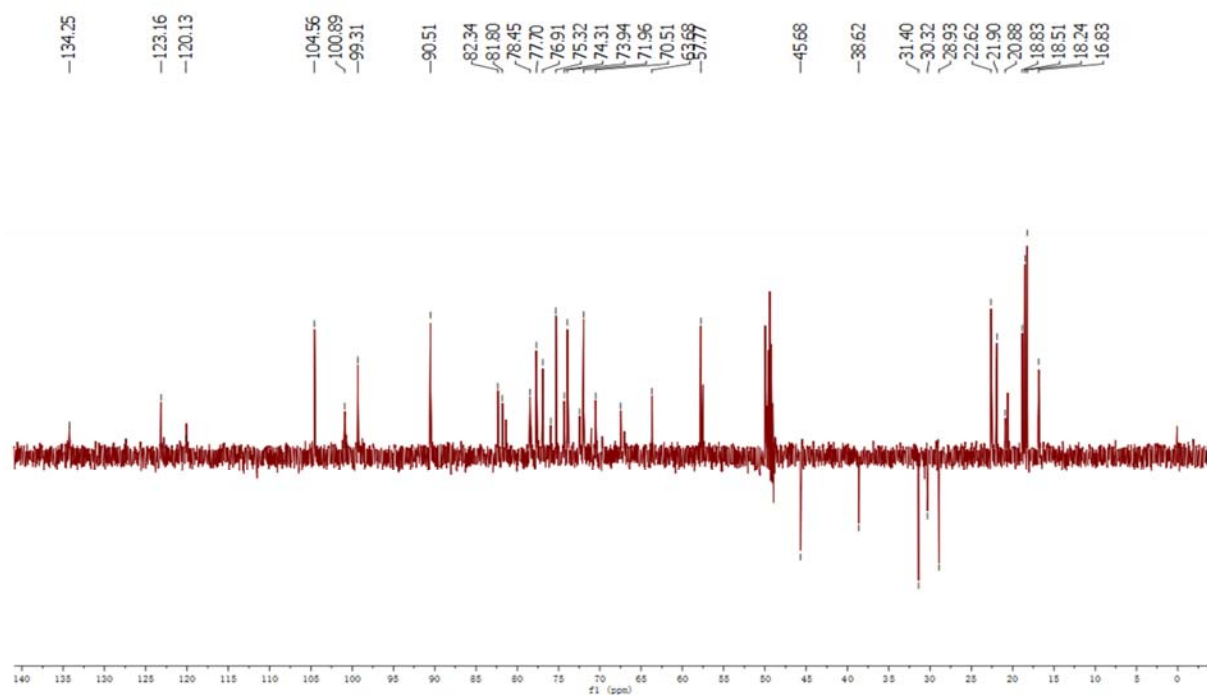

Figure S 11. DEPT-135 spectrum in MeOD for compound 2.

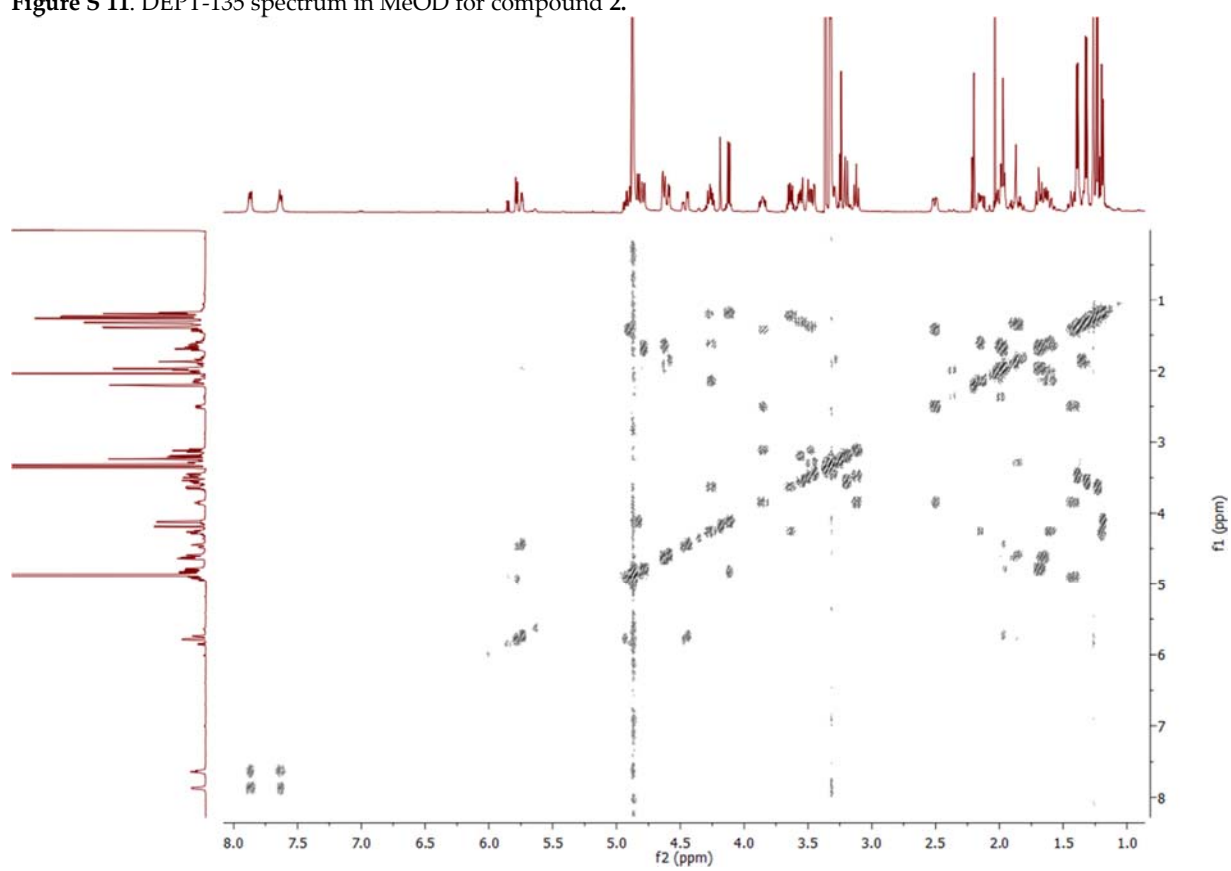

Figure S 12. COSY spectrum in MeOD for compound 2.



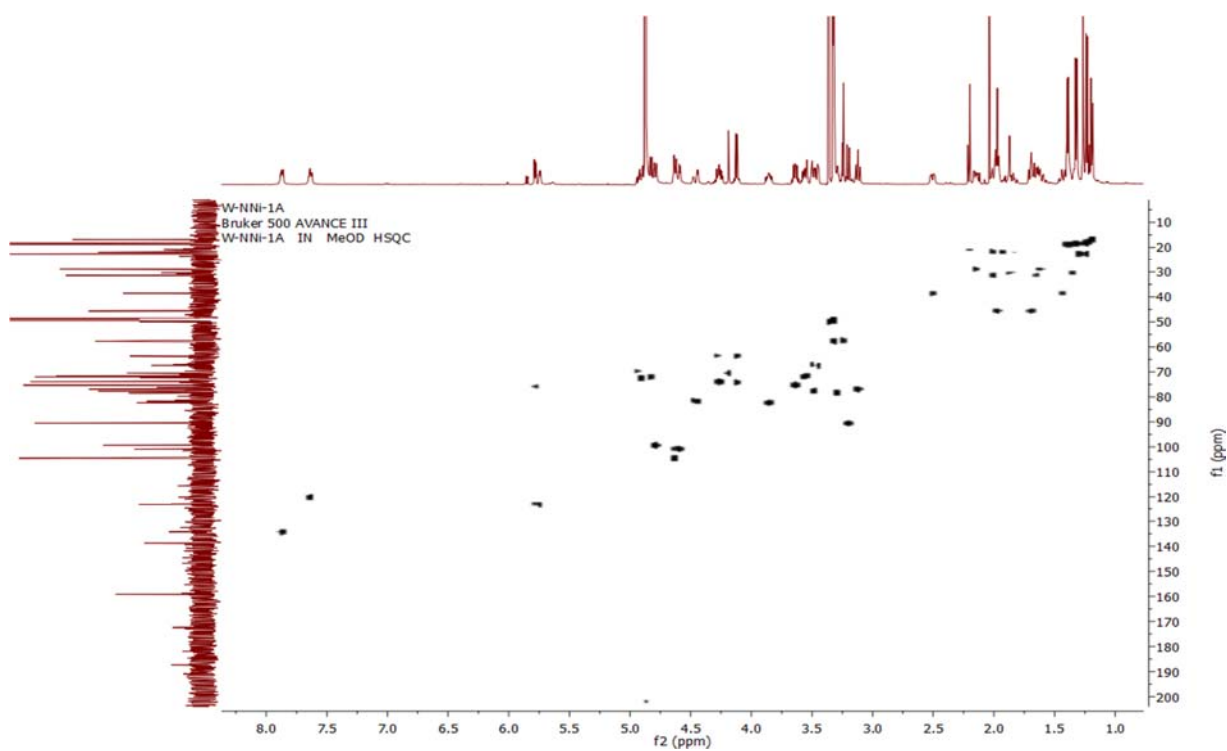

Figure S 13. HSQC spectrum in MeOD for compound 2.

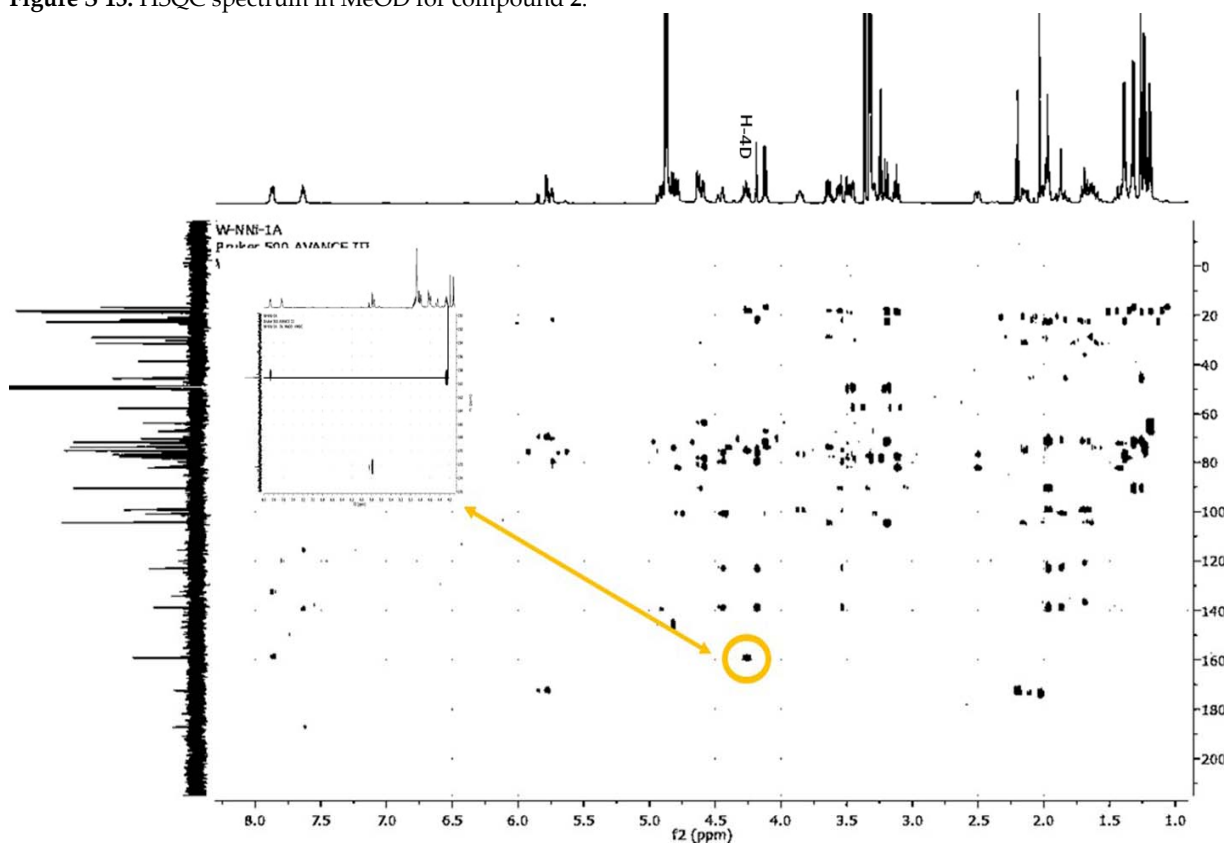

Figure S 14. HMBC spectrum in MeOD for compound 2.

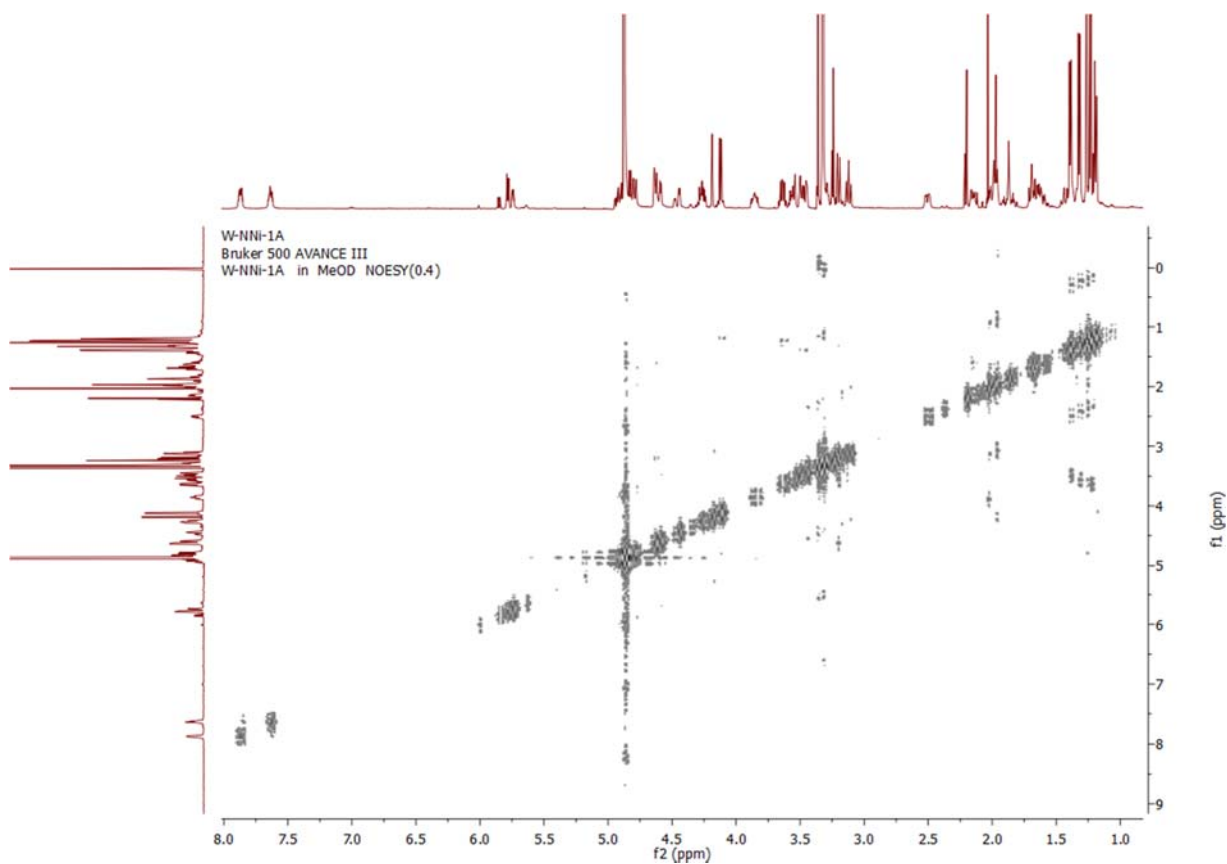

Figure S 15. NOESY spectrum in MeOD for compound 2.

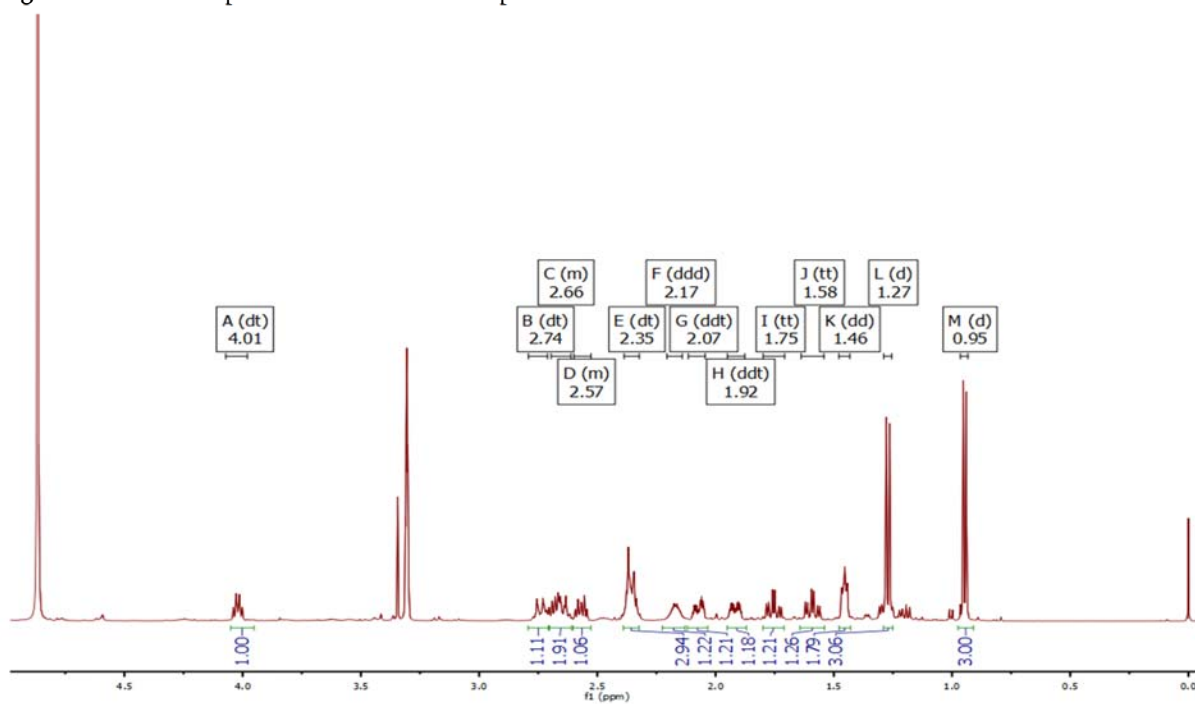

Figure S 16.  $^1\text{H}$  NMR spectrum in MeOD for compound 3.

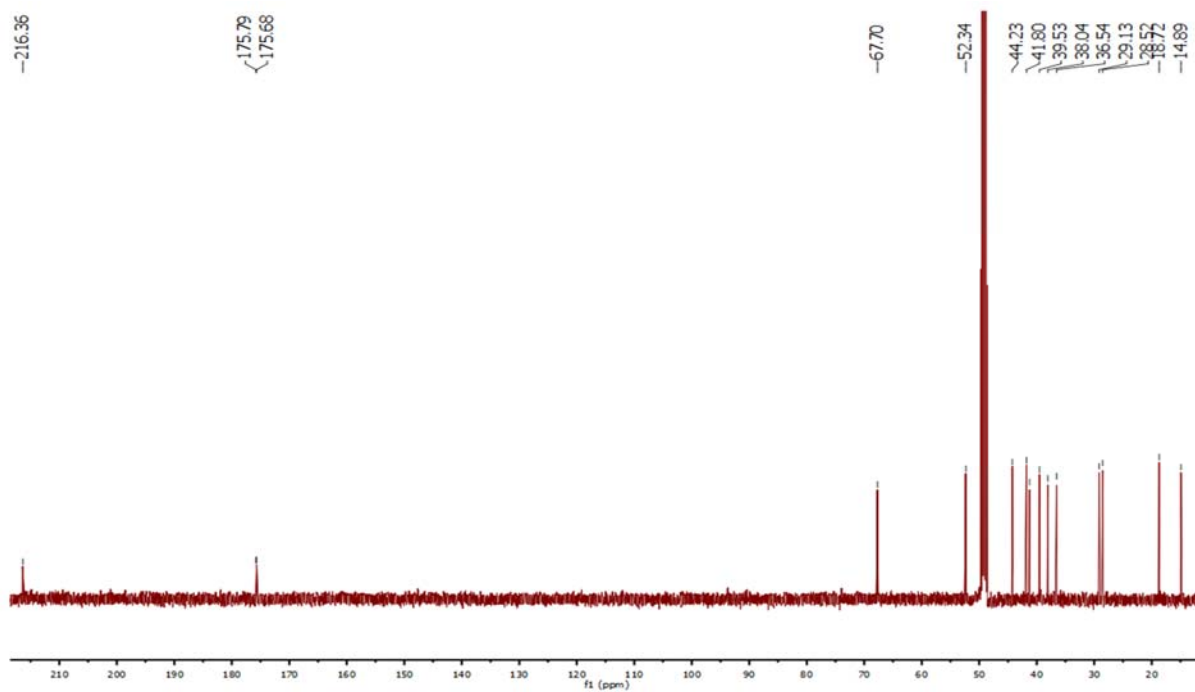

Figure S 17.  $^{13}\text{C}$  NMR spectrum in MeOD for compound 3.

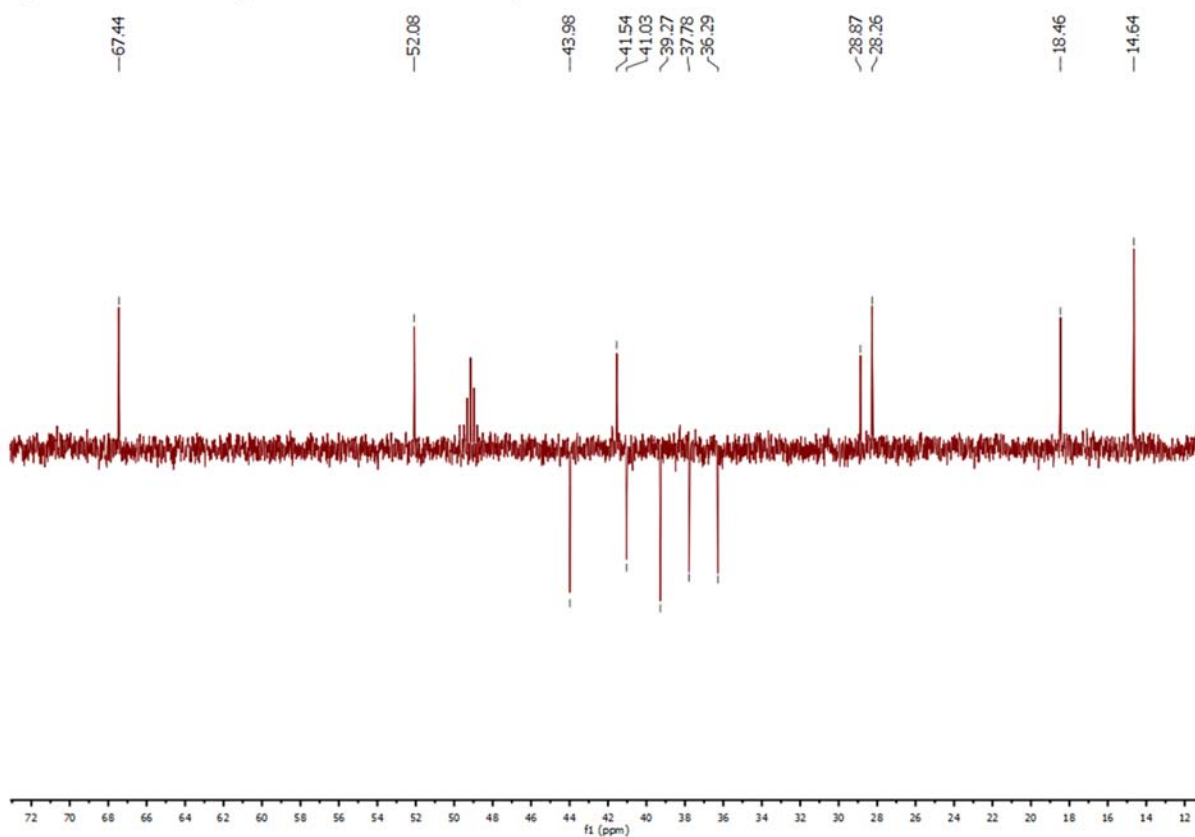

Figure S 18. DEPT-135 spectrum in MeOD for compound 3.

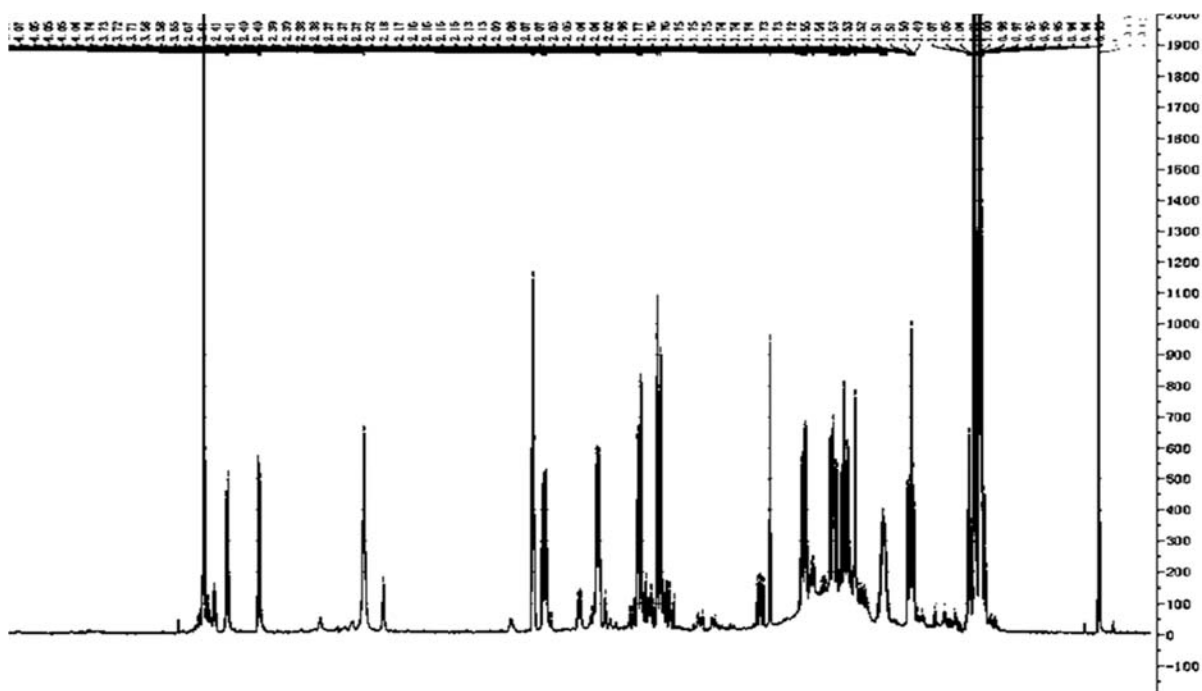

Figure S 19.  $^1\text{H}$  NMR spectrum in  $\text{CDCl}_3$  for compound 4.

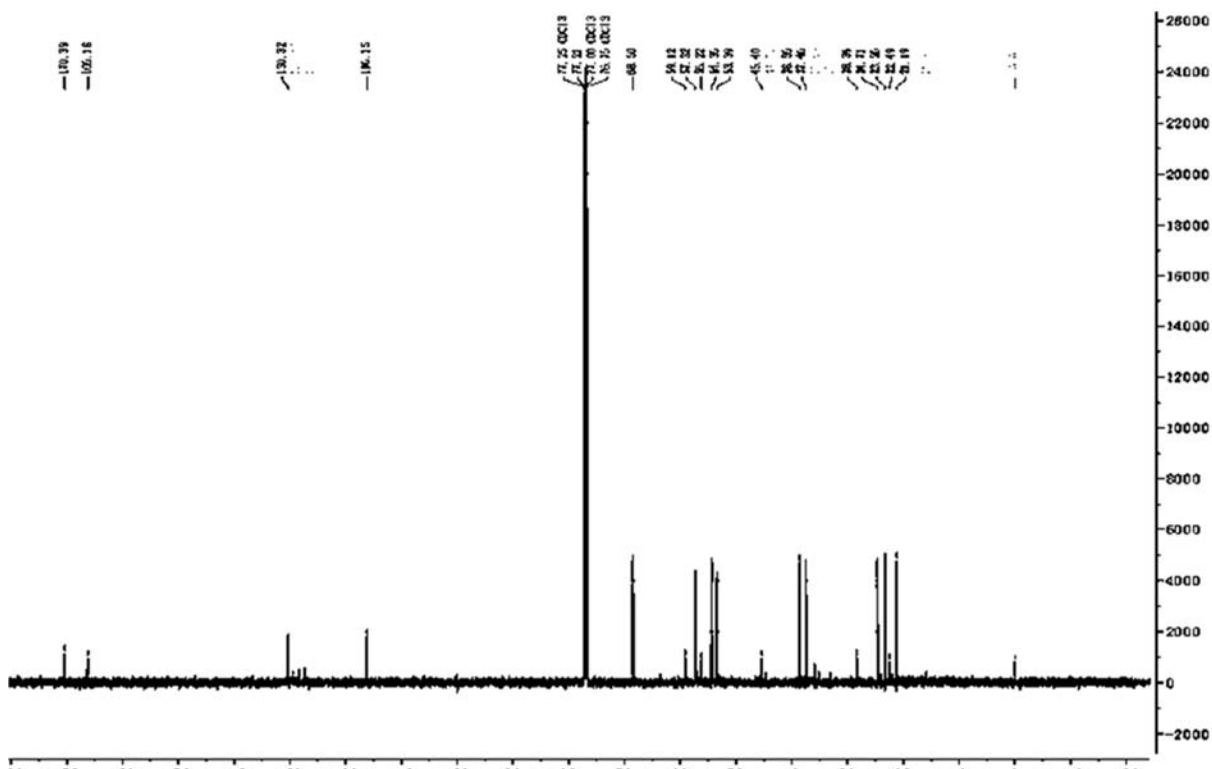

Figure S 20.  $^{13}\text{C}$  NMR spectrum in  $\text{CDCl}_3$  for compound 4.



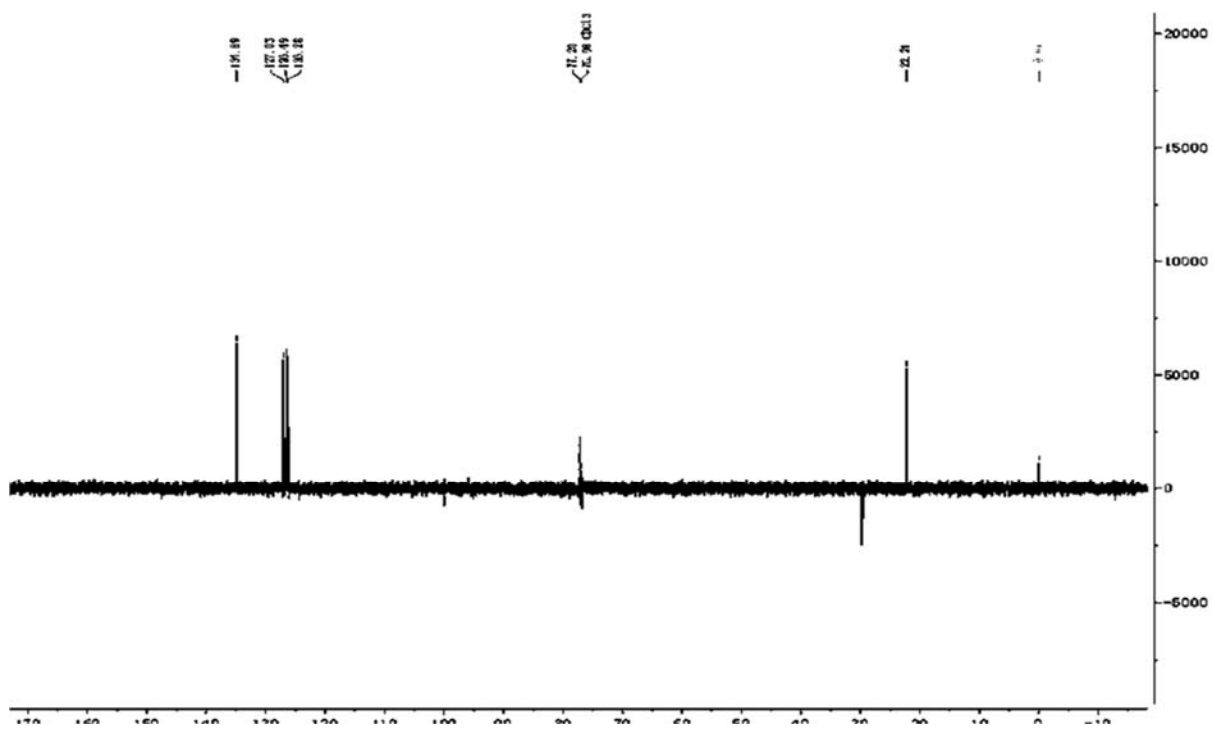

Figure S 23. DEPT spectrum in CDCl<sub>3</sub> for compound 5.

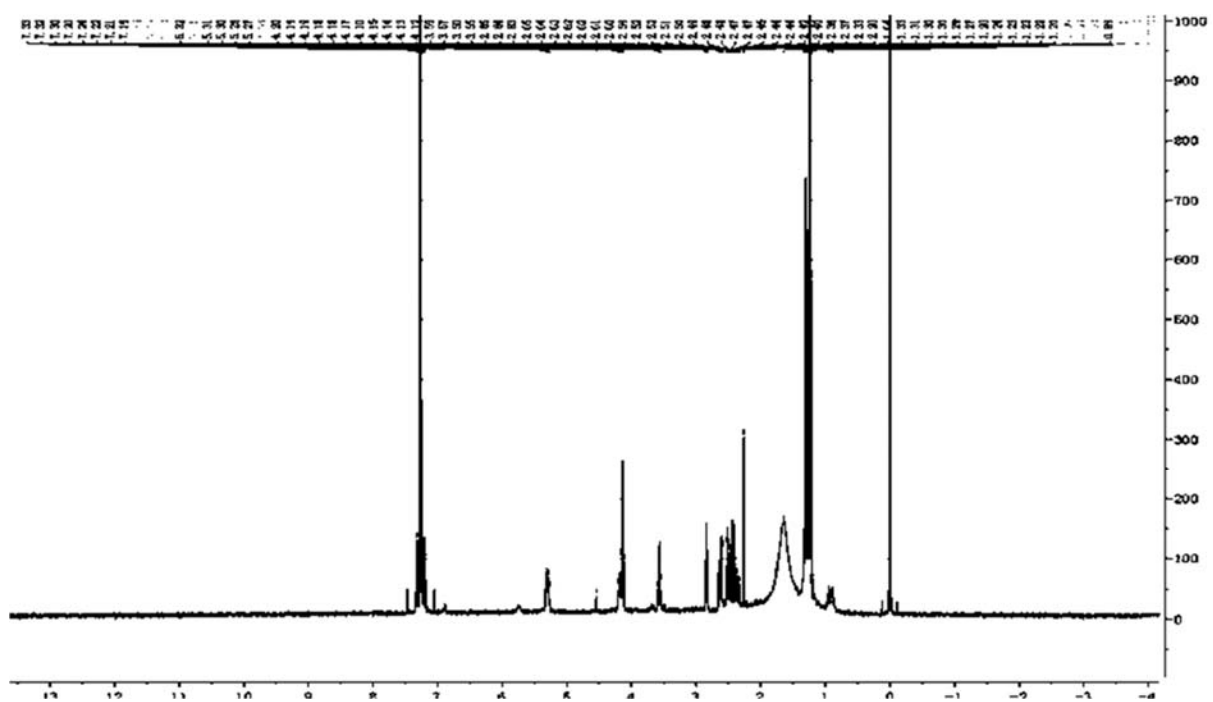

Figure S 24. <sup>1</sup>H NMR spectrum in CDCl<sub>3</sub> for compound 6.

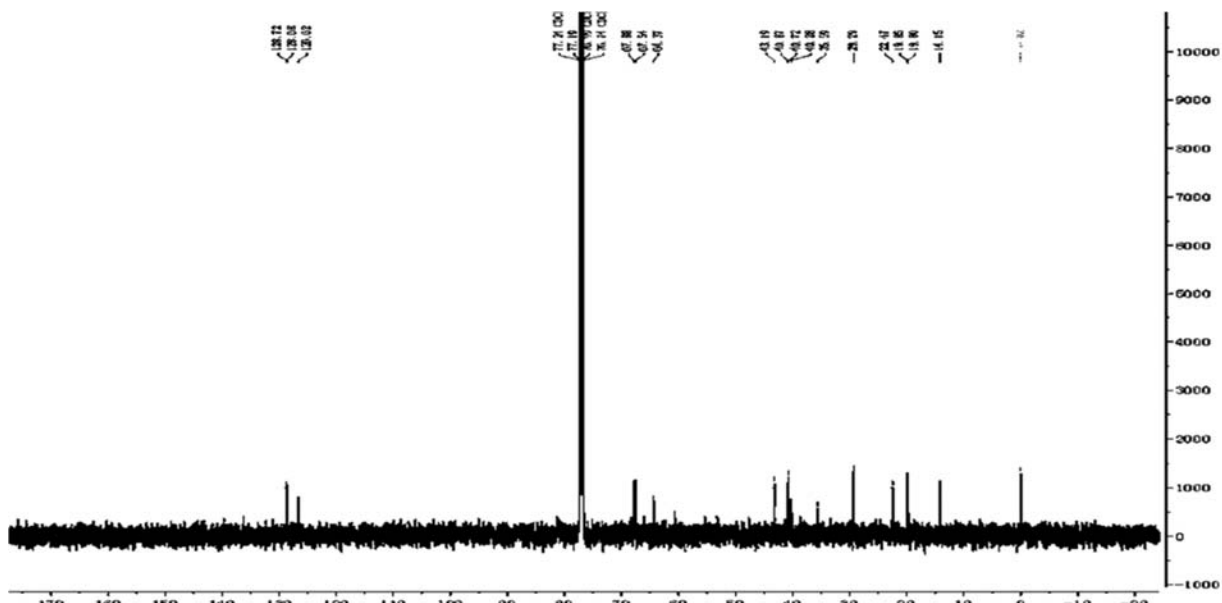

Figure S 25. <sup>1</sup>H NMR spectrum in CDCl<sub>3</sub> for compound 6.

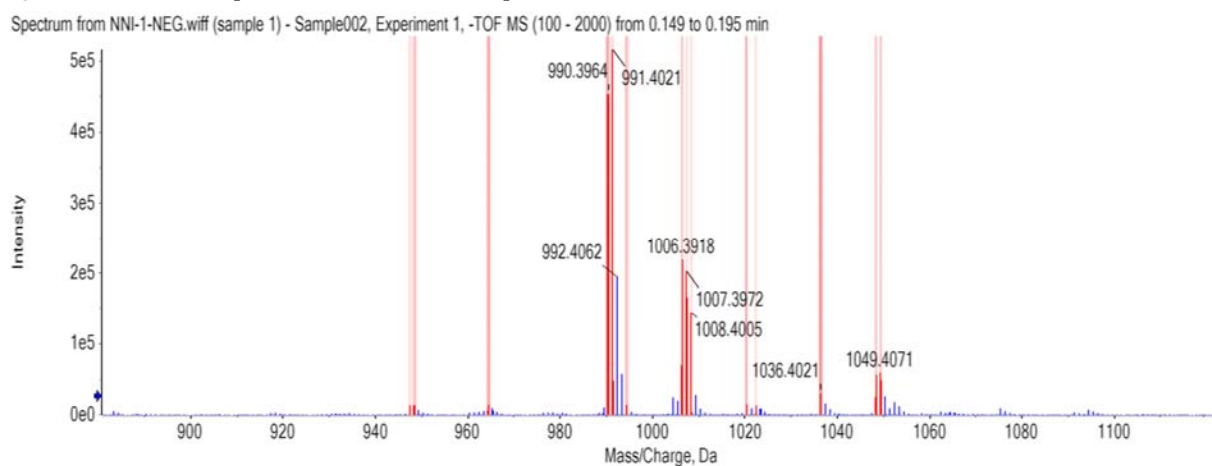

Figure S 26. HR-TOF-MS spectrum in negative mode for compound 1.

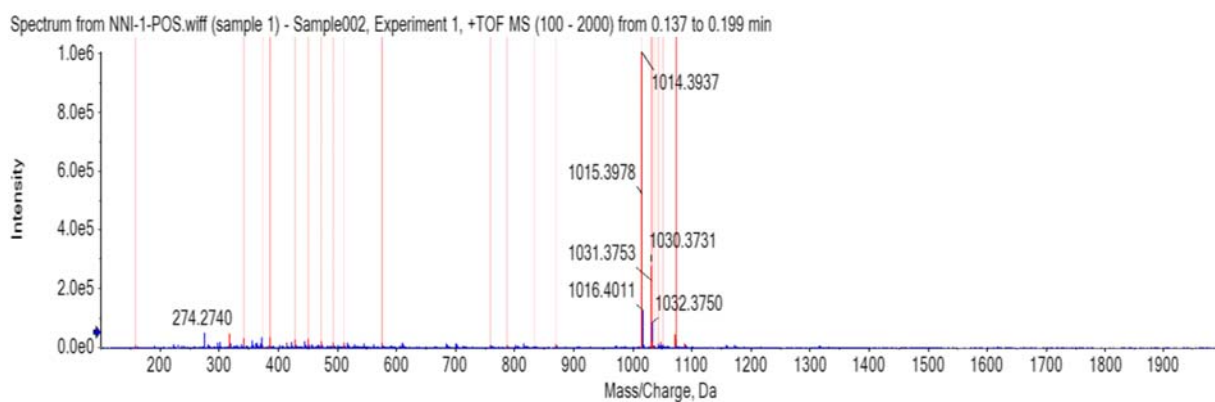

Figure S 27. HR-TOF-MS spectrum in positive mode for compound 1.

NNI-1\_171017141246#126-135 RT: 1.80-1.98 AV: 8 NL: 2.02E3  
T: ITMS + c ESI Full ms2 1014.50@cid25.00 [275.00-2000.00]

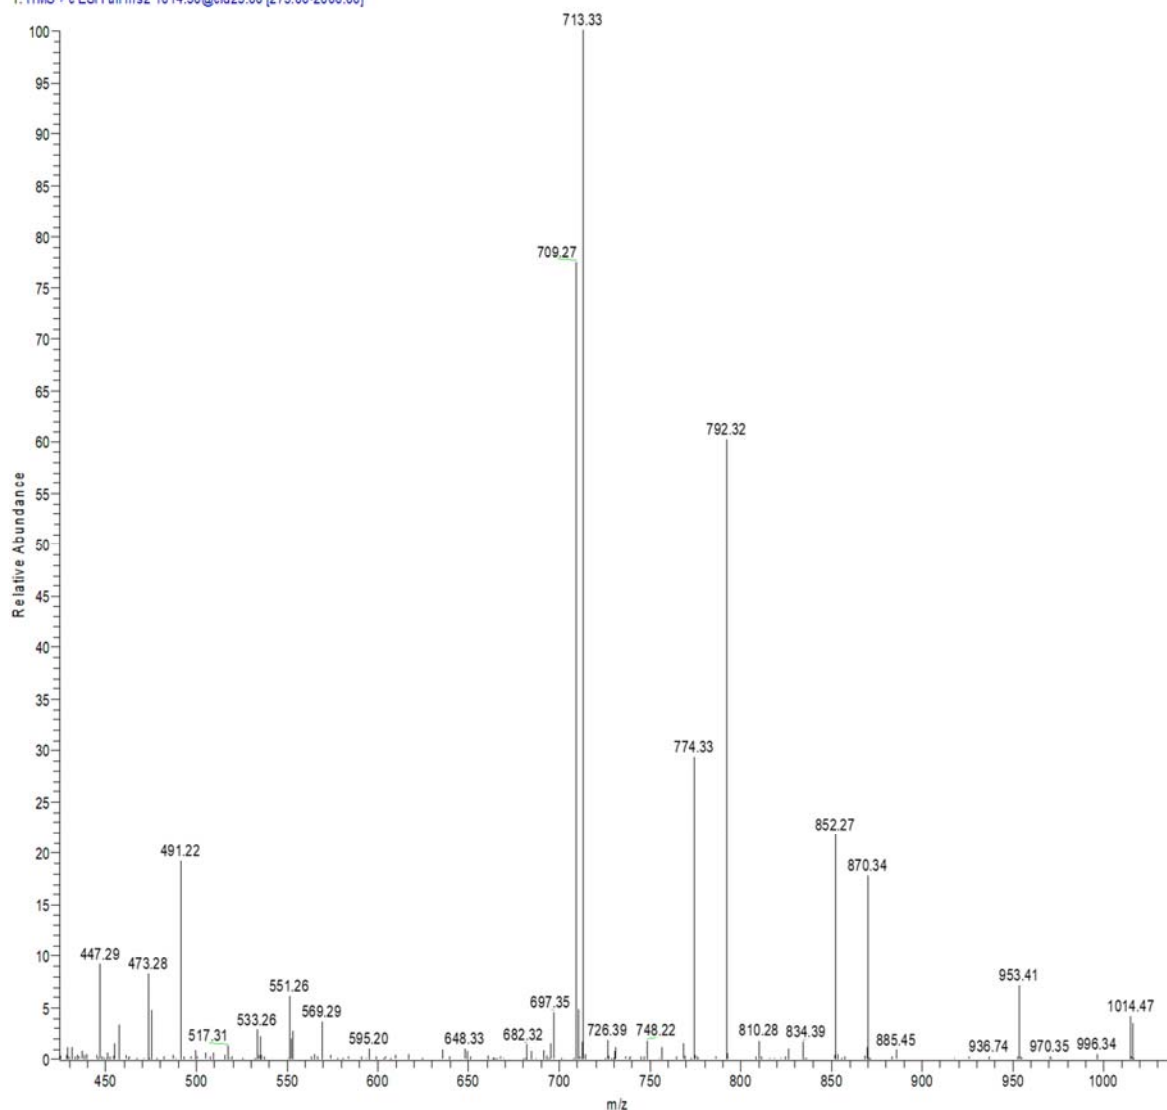

Figure S 28. MS<sup>n</sup> Spectrum for compound 1.

Spectrum from NNI-1A-NEG.wiff (sample 1) - Sample004, Experiment 1, -TOF MS (100 - 2000) from 0.168 min

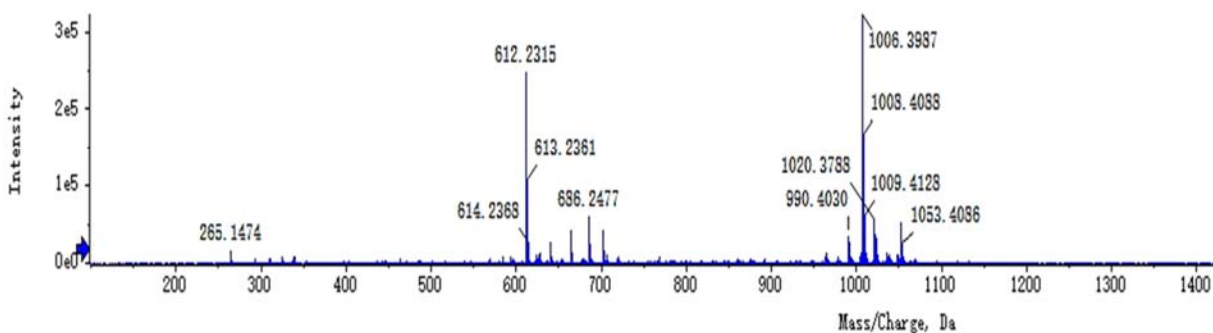

Figure S 29. HR-TOF-MS spectrum in negative mode for compound 2.



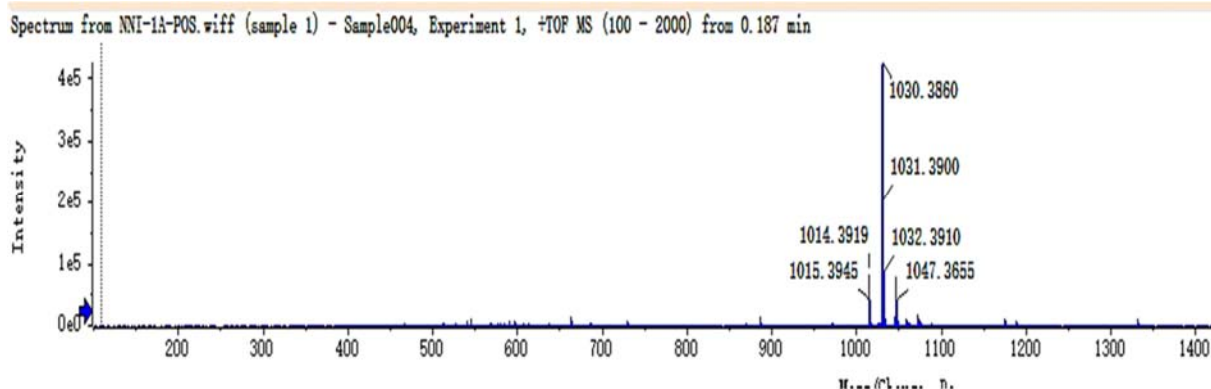

Figure S 30. HR-TOF-MS spectrum in negative mode for compound 2.

Table S 1. Biological activities of compounds (1-5) (MIC values are given in  $\mu\text{g/mL}$ )

| Compounds    | MRSA  | <i>Pseudomonas aeruginosa</i> | <i>Klebsiella pneumoniae</i> | <i>Escherichia coli</i> | <i>Bacillus subtilis</i> |
|--------------|-------|-------------------------------|------------------------------|-------------------------|--------------------------|
|              | MIC   | MIC                           | MIC                          | MIC                     | MIC                      |
| 1            | 16    | 16                            | 16                           | 16                      | 8-16                     |
| 2            | 16    | 16                            | 16                           | 16                      | 8-16                     |
| 3            | 16-32 | 16-32                         | 16-32                        | -                       | -                        |
| 4            | 32    | 16                            | 16                           | 16                      | 16                       |
| 5            | 32    | 16                            | 16                           | 16                      | 16                       |
| Tetracycline | 16    | 32                            | 32                           | 16                      | 8                        |

| Strain                                     | 16S rDNA gene sequence                                                                                                                                                                                                                                                                                                                                                                                                                                                                                                                                                                                                                                                                                                                                                                                                                                                                                                                                                                                                                                                                                                                                                                                                                                                                                                                                                                                                                                                                                                                                                                         |
|--------------------------------------------|------------------------------------------------------------------------------------------------------------------------------------------------------------------------------------------------------------------------------------------------------------------------------------------------------------------------------------------------------------------------------------------------------------------------------------------------------------------------------------------------------------------------------------------------------------------------------------------------------------------------------------------------------------------------------------------------------------------------------------------------------------------------------------------------------------------------------------------------------------------------------------------------------------------------------------------------------------------------------------------------------------------------------------------------------------------------------------------------------------------------------------------------------------------------------------------------------------------------------------------------------------------------------------------------------------------------------------------------------------------------------------------------------------------------------------------------------------------------------------------------------------------------------------------------------------------------------------------------|
| <i>Streptomyces pratensis</i><br>NA-ZhouS1 | AGGGCGGGCGTGCTTACCATGTCAGTCGAACGATGAAGCCTTTCCG<br>GGTGGATTAGTGGCGAACGGGTGAGTAACACGTGGGCAATCTGCC<br>CTTCACTCTGGGACAAGCCCTGGAAACGGGGTCTAATACCGGATA<br>ACACTCTGTCCCGCATGGGACGGGGTTAAAGCTCCGGCGGTGAA<br>GGATGAGCCCGCGGCTATCAGCTTGTGGTGGGGTAATGGCCTAC<br>CAAGGCGACGACGGGTAGCCGGCCTGAGAGGGCGACCCGCCACA<br>CTGGGACTGAGACACGGCCAGACTCCTACGGGAGGCAGCATGG<br>GGAATATGCAACAATGGGCGAAAGCCTGATGCAGCGACGCCGCT<br>GAGGGATGACGGCCTTCGGGTGTAAACCTCTTTCAGCAGGGAAG<br>AAGCGAAAGTGACGGTACCTGCAGAGAAAGCGCCGGCTAACTAC<br>GTGCCAGCAGCCGGTAATACGTAGGGCGCAAGCGTTGTCCGGA<br>ATTATTGGGCGTAAAGAGCTCGTAGGGCGCTTGTACGTCGGATGT<br>GAAAGCCC GGCGCTTAACCCCGGGTCTGCATTCGATACGGGCTAG<br>CTAGAGTGTGGTAGGGGAGATCGAATTCTGGTGTACGGTGAA<br>ATGCGCAGATATCAGGAGGAACACCGGTGGCGAAGGCGGATCTCT<br>GGGCCATTACTGACGCTGACGAGCGAAAGCGTGGGAGCGAACA<br>GGATTAGATACCCTGGTAGTCCACGCCGTAACGTTGGGAAGTAC<br>GTGTGGCGACATTCCACGTCGTCGGTGCCCGACGTAACGCATTAA<br>GTTCCCCGCTGGGGAGTACGGCCGCAAGGCTAAAACTCAAAGGA<br>ATTGACGGGGGCCCGCACAAGCAGCGGAGCATGTGGCTTAATTTCG<br>ACGCAACCGGAAGAACCCTTACCAAGGCTTGACATATACCGGAAAG<br>CATCAGAGATGGTGCCTTGTGGTTCGGTATACAGGTGGTGCAT<br>GGCTGTCGTCAGCTCGTGTGAGATGTTGGGTTAAGTCCCGCAA<br>CGAGCGCAACCCTTGTCTGTGTTGCCAGCATGCCCTTCGGGGTGA<br>TGGGGACTCACAGGAGACTGCCGGGTCAACTCGGAGGAAGGTGG<br>GGACGACGTCAAGTCAATCATGCCCTTATGTCTTGGGCTGCACAG<br>TGCTACAATGGCCGGTACAATGAGCTGCGATGCCCGGAGCGGAG<br>CGAATCTCAAAAAGCCGGTCTCAGTTCGGATTGGGGTCTGCAACTC<br>GACCCCATGAAGTCGGAGTTGTAGTAATCGCAGATCAGCAATTGCT<br>GCGGTGAATACGTTCCCGGGCTTGTACACACCCCGCTCACGTCA<br>CGAAAGTCGGTAACACCCGAAAGCCGGTGGCCCAACCCTTGTGGG<br>AGGAGCTTCGAAAGGTGTACGGCAAGTTCCCTT |

Figure S 31. 16S ribosomal DNA gene, full sequence of *Streptomyces* sp. NA-ZhouS1

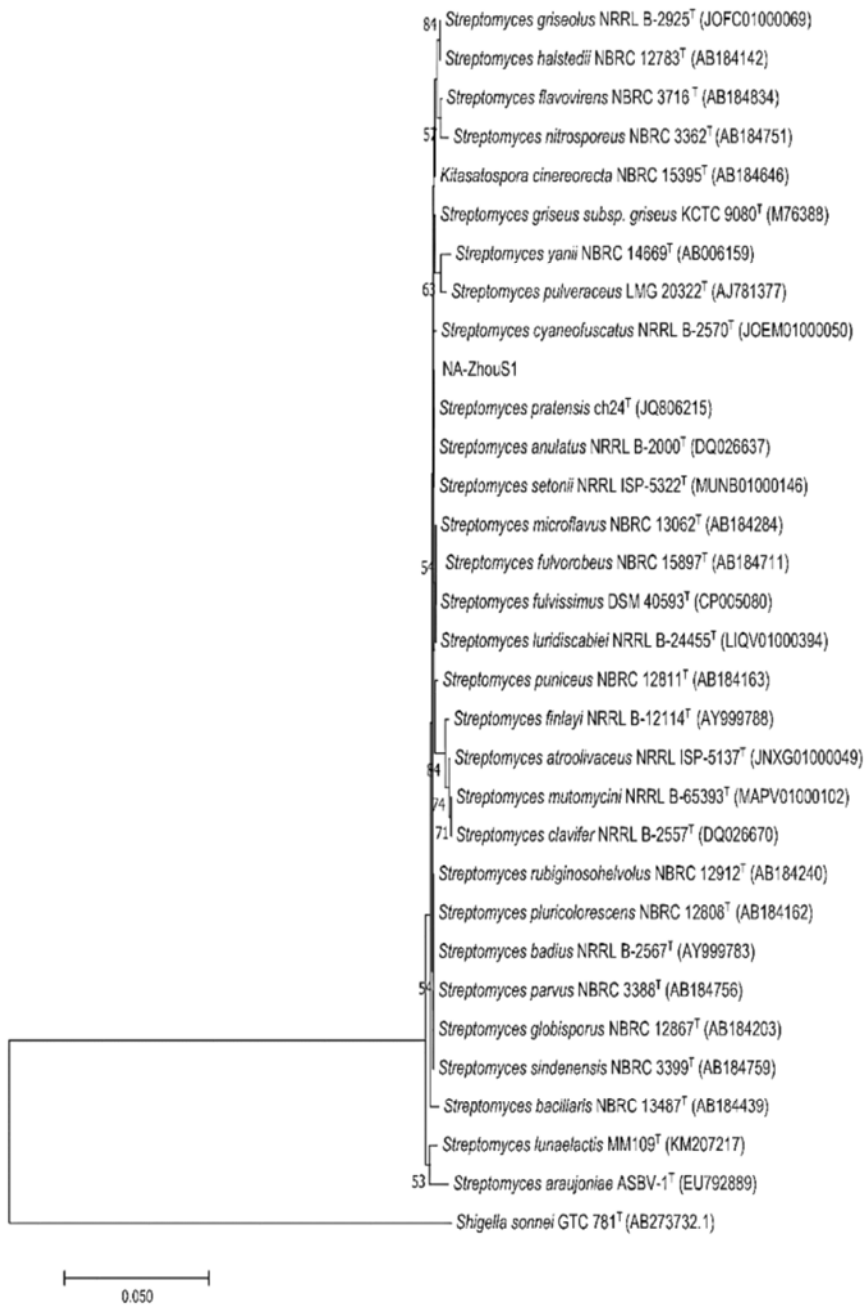

**Figure S 32.** Neighbor-joining phylogenetic tree of strain NA-ZhouS1 based on 16S rDNA sequences generated by Mega version 7. Numbers at branch points indicate levels of bootstrap (expressed as percentages of 1000 replicates), only values exceeding 50% are given. *Shigella sonnei* GTC 781<sup>T</sup> (AB273732.1) was used as an outgroup. Bar, 0.050 substitutions per nucleotide position.
